# Supplementary material for: A Toxicogenomic Approach Reveals a Novel Gene Regulatory Network Active in In Vitro and In Vivo Models of Thyroid Carcinogenesis
Source: PubMed Central journal article supplement (PMC6338918; doi:10.3390/ijerph16010122), 2019-01-04
Supplement: ijerph-16-00122-s001.pdf [file ijerph-16-00122-s001.pdf]

## Supplementary Material

### A Toxicogenomic Approach Reveals a Novel Gene Regulatory Network Active in In Vitro and In Vivo Models of Thyroid Carcinogenesis

Carla Reale, Filomena Russo, Sara Carmela Credendino, Danila Cuomo, Gabriella De Vita, Massimo Mallardo, Francesca Pennino, Immacolata Porreca, Maria Triassi, Mario De Felice and Concetta Ambrosino

Table S1. CPF cluster genes.

| Gene name | Gene ID | Gene ontology                         |
|-----------|---------|---------------------------------------|
| Ddit4     | 140942  | Cell proliferation                    |
| Zfp3612   | 298765  | Regulation of mRNA stability          |
| Zfp703    | 680717  | Regulation of cell cycle              |
| Dmbt1     | 170568  | Cell differentiation                  |
| Cpeb2     | 360949  | Cellular response to oxidative stress |
| Chd9      | 307726  | Chromatin organization                |
| Smg7      | 360855  | Regulation of RNA stability           |

Table S2. Primer sequences used for RT-qPCR.

| Gene name | Species              | Forward sequence         | Reverse sequence         |
|-----------|----------------------|--------------------------|--------------------------|
| Gapdh     | <i>R. Norvegicus</i> | CATGGCCTTCCGTGTTCCCTA    | AGCCTGCTTCACCACCTTCTTGAT |
| Ddit4     | <i>R. Norvegicus</i> | TGGGATCGTTTCTCGTCCTC     | TGGGATCGTTTCTCGTCCTC     |
| Chd9      | <i>R. Norvegicus</i> | CAAAGACGAAGGTGGTTTGAAGT  | TTGGAGGTGTTCAACAACGCT    |
| Snrpb     | <i>R. Norvegicus</i> | GAGAAGAGAAGCGAGTCCTTGG   | GGGCAATGCCAGTATCTTTGG    |
| Znf703    | <i>R. Norvegicus</i> | CCATTGAGCTGGACGCCAAGA    | GGCTCGGGTCTTCTCGGAT      |
| Dmbt1     | <i>R. Norvegicus</i> | GGCTGGTAAATGGAACAAACCG   | GGCACACGGTACCCAAGAG      |
| p65       | <i>R. Norvegicus</i> | CTTTCAAGGTGCCCTACTCGG    | CACATGGCCAAAATCCACGG     |
| IκBα      | <i>R. Norvegicus</i> | CTTCTCCATCTTGCCCTGTGA    | CGTTGACATCAGCACCCAAA     |
| Zfp3612   | <i>R. Norvegicus</i> | CCCCTCGTCCGTTATTCGTC     | GGGATTTCTCCGTCTTGACA     |
| Bcl2      | <i>R. Norvegicus</i> | CTGACGCCCTTCACCCGCGAG    | CAAAGGCATCCCAGCCTCCGT    |
| Cpeb2     | <i>R. Norvegicus</i> | GAGCACGATCCTCTCAAGGG     | AAGATCGACCTCGTCTTCGC     |
| Bax       | <i>R. Norvegicus</i> | TTGCTACAGGGTTTCATCCAGG   | CACTCGCTCAGCTTCTTGGT     |
| Gapdh     | <i>M. Musculus</i>   | AGGTCGGTGTGAACGGATTG     | TGTAGACCATGTAGTTGAGGTCA  |
| Snrpb     | <i>M. Musculus</i>   | ATCGGGACCTTCAAAGCCTTT    | CCCTTTCTGCTTGTTTGGAGTT   |
| Znf703    | <i>M. Musculus</i>   | TCCTGCACCCGGAGTACCTG     | TGGGTTAGTCCCCGAGTGTGAC   |
| Dmbt1     | <i>M. Musculus</i>   | GTATTACTGCGAGAGGGTTCCA   | GAATAGCCCATGGACTGAAGGT   |
| Cpeb2     | <i>M. Musculus</i>   | GCTTGTTGGATGATGGTCACAG   | ACCAAAGGTCCAAATCTTCGGA   |
| Chd9      | <i>M. Musculus</i>   | CCCCTGTCTACCAACCATCAA    | TTTCGTGGCTTCTTCTCAGACA   |
| Bcl2      | <i>M. Musculus</i>   | ATGACTGAGTACCTGAACCGGCAT | GGGCCATATAGTTCCACAAAGGCA |
| IκBα      | <i>M. Musculus</i>   | CGCTCTTGTTGAAATGTGGGGG   | ATAGGGCAGCTCATCCTCTGT    |
| Ddit4     | <i>M. Musculus</i>   | GGGATCGTTTCTCGTCCTCC     | ATGAGGAGTCTTCCTCCGGC     |
| p65       | <i>M. Musculus</i>   | AAGCGCAAAGGACCTATGA      | GCTTGGGGACAGAAGTTGAG     |
| Zfp3612   | <i>M. Musculus</i>   | CCCTCGCCGTTATTCATCT      | CCAGGGATTTCTCCGTCTTG     |
| Bax       | <i>M. Musculus</i>   | ACAGATCATGAAGACAGGGG     | CAAAGTAGAAGAGGGCAACC     |
